# Supplementary material for: Unveiling the structural mechanisms behind high affinity and selectivity in phosphorylated epitope-specific rabbit antibodies
Source: PubMed Central journal article supplement (PMC11681868; doi:10.1016/j.jbc.2024.107989), 2024-11-13
Supplement: mmc1.pdf [file mmc1.pdf]

## Supplementary Figures.

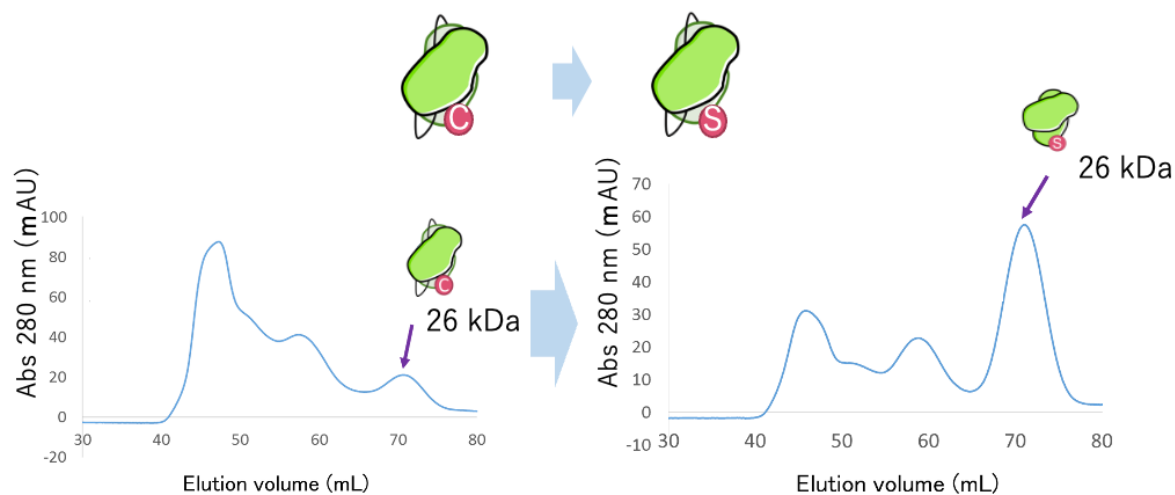

**Figure S1. Elution curves of the size exclusion chromatography (SEC) of scFv (A4) with Cys80 (Left) and Cys80Ser (Right).**

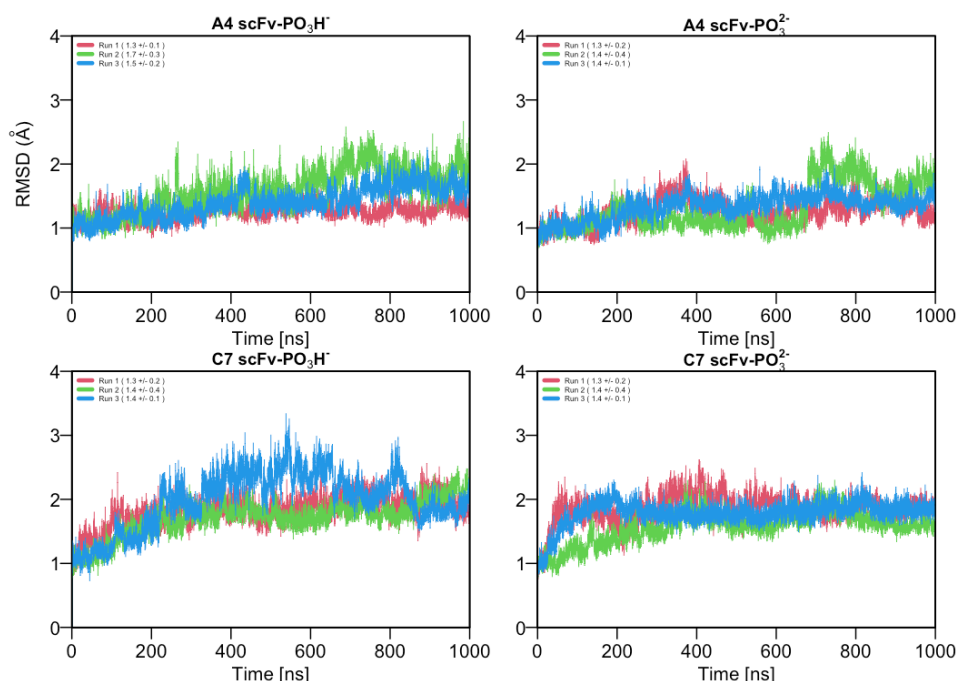

**Figure S2.  $\alpha$ -RMSDs of A4 scFv and C7 scFv excluding the GS linkers and the 5 N-terminal and C-terminal residues. Different colors represent different replicates of the simulations.**

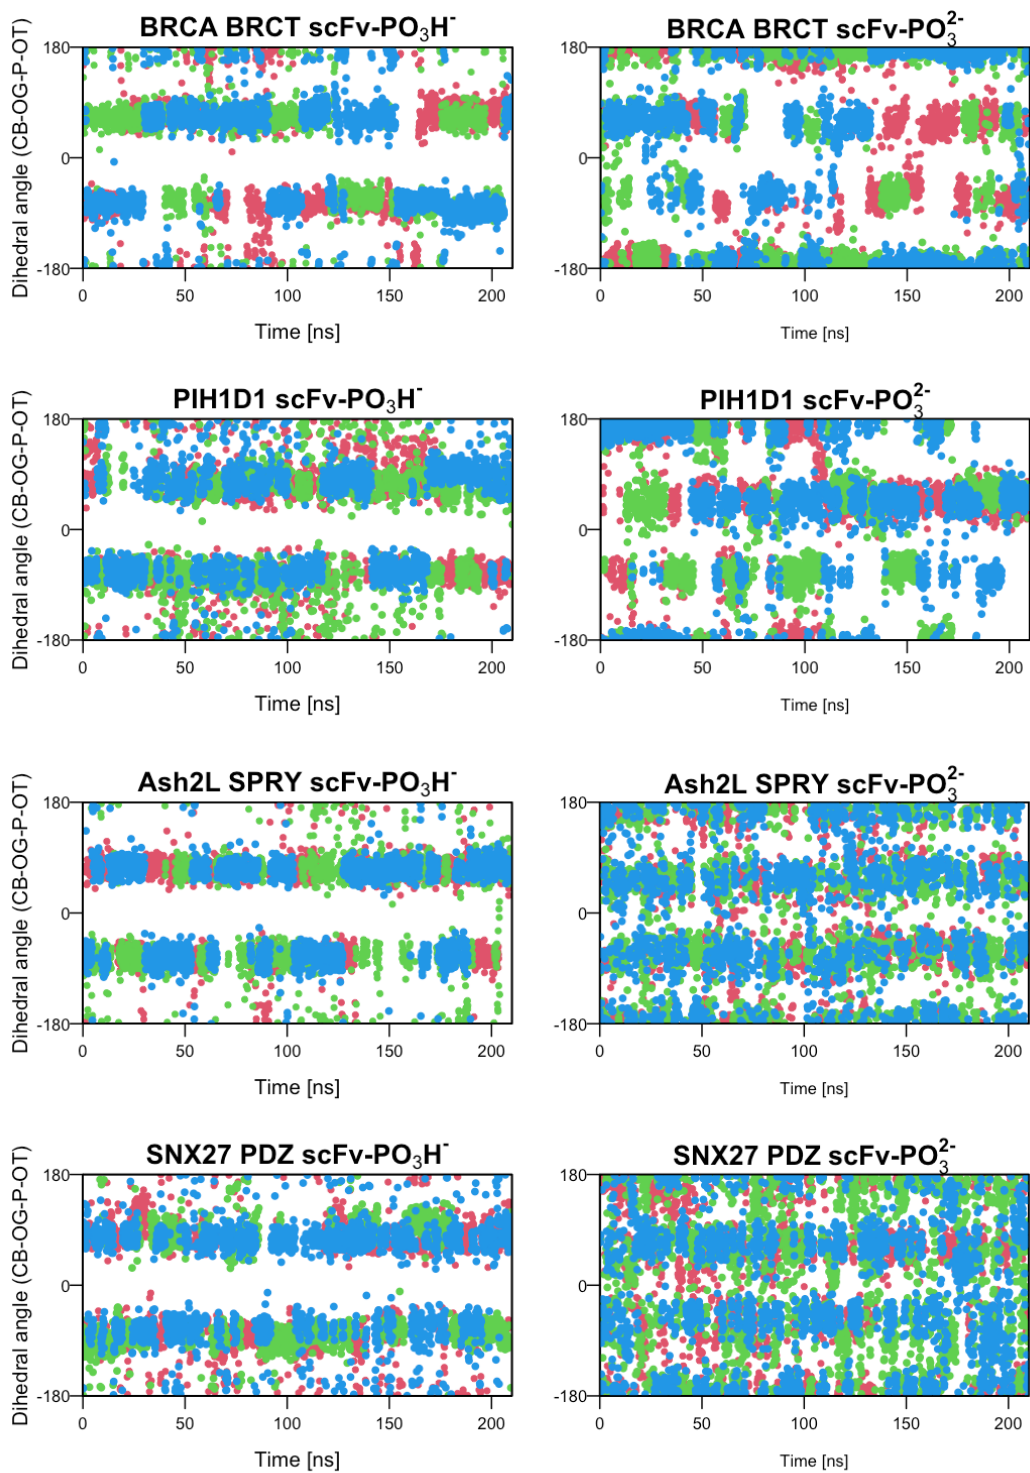

**Figure S3.** Time evolution of the dihedral angle consisting of CB, OG, P and OT atoms of the phosphate group during the simulations of non-antibody proteins. MD trajectories were taken from a previous study (10). Different colors represent different replicates of the simulations.
