# Supplementary material for: Unveiling the structural mechanisms behind high affinity and selectivity in phosphorylated epitope-specific rabbit antibodies
Source: PubMed Central journal article supplement (PMC11681868; doi:10.1016/j.jbc.2024.107989), 2024-11-13
Supplement: mmc2.pdf [file mmc2.pdf]

## Supplementary Tables.

**Table S1. ELISA signals (A450) against phosphorylated antigen and non-phosphorylated antigen by 4 rabbit monoclonal antibodies obtained in this study.**

| Clone #   | Phosphorylated-peptide | Non-phosphorylated-peptide |
|-----------|------------------------|----------------------------|
| Ramos-C7  | 3.69                   | 0.072                      |
| Ramos-G11 | 3.76                   | 0.11                       |
| Ramos-A3  | 3.61                   | 0.29                       |
| Ramos-A4  | 3.61                   | 0.18                       |

**Table S2. Parameters of ITC about the interaction between the 4 rabbit monoclonal antibodies and phosphorylated antigen or non-phosphorylated antigen.**

| Antibody | Parameters  | Phosphorylated-peptide | Non-phosphorylated-peptide |
|----------|-------------|------------------------|----------------------------|
| A3 scFv  | $K_D$       | 31.8 nM                | Did not bind               |
|          | $\Delta H$  | -18.5 kcal/mol         |                            |
|          | $T\Delta S$ | -8.3 kcal/mol          |                            |
| A4 scFv  | $K_D$       | 3.34 nM                | 1.12 $\mu$ M               |
|          | $\Delta H$  | -24.4 kcal/mol         | -8.56 kcal/mol             |
|          | $T\Delta S$ | -12.8 kcal/mol         | -0.42 kcal/mol             |
| G11 scFv | $K_D$       | 18.1 nM                | Weak binding               |
|          | $\Delta H$  | -21.6 kcal/mol         |                            |
|          | $T\Delta S$ | -11.0 kcal/mol         |                            |
| C7 scFv  | $K_D$       | 26.9 nM                | Did not bind               |
|          | $\Delta H$  | -14.4 kcal/mol         |                            |
|          | $T\Delta S$ | -4.0 kcal/mol          |                            |

**Table S3. Data collection and refinement statistics. Statistical values given in parenthesis refer to the highest resolution bin.**

|                                                         | <b>A4 scFv + peptide</b>  | <b>C7 scFv + peptide</b>  | <b>C7 Fab + peptide</b>   |
|---------------------------------------------------------|---------------------------|---------------------------|---------------------------|
| Space Group                                             | P 1                       | P 3 <sub>2</sub> 2 1      | P 1                       |
| Unit cell                                               |                           |                           |                           |
| a, b, c (Å)                                             | 43.5, 43.6, 63.5          | 126.6, 126.6, 82.4        | 54.4, 67.8, 71.3          |
| $\alpha$ , $\beta$ , $\gamma$ (°)                       | 71.3, 84.4, 87.6          | 90.0, 90.0, 120.0         | 112.5, 105.0, 98.3        |
| Resolution (Å)                                          | 41.3 – 1.40 (1.47 – 1.40) | 49.8 – 2.80 (2.85 – 2.80) | 48.0 – 1.33 (1.35 – 1.33) |
| Wavelength                                              | 1.0000                    | 1.0000                    | 1.0000                    |
| Observations                                            | 144,045 (19,558)          | 210,688 (30,951)          | 656,828 (22,144)          |
| Unique reflections                                      | 77,744 (10,677)           | 19,037 (2,756)            | 188,006 (6,654)           |
| <i>R</i> <sub>merge</sub>                               | 0.092 (0.368)             | 0.176 (1.030)             | 0.043 (0.463)             |
| <i>R</i> <sub>p.i.m.</sub>                              | 0.092 (0.368)             | 0.055 (0.321)             | 0.035 (0.383)             |
| CC <sub>1/2</sub>                                       | 0.977 (0.650)             | 0.996 (0.807)             | 0.998 (0.781)             |
| <i>I</i> / $\sigma$ ( <i>I</i> )                        | 5.7 (2.1)                 | 12.8 (2.6)                | 15.4 (2.2)                |
| Multiplicity                                            | 1.9 (1.8)                 | 11.1 (11.2)               | 3.5 (3.3)                 |
| Completeness (%)                                        | 88.8 (83.4)               | 99.8 (100.0)              | 93.5 (66.6)               |
| <b>Refinement Statistics</b>                            |                           |                           |                           |
| Resolution (Å)                                          | 41.3 – 1.40               | 49.8 – 2.80               | 49.8 – 1.33               |
| <i>R</i> <sub>work</sub> / <i>R</i> <sub>free</sub> (%) | 16.2 / 19.9               | 30.4 / 34.5               | 13.7 / 16.5               |
| No. complexes                                           | 2                         | 2                         | 2                         |
| No. atoms                                               |                           |                           |                           |
| Antibody                                                | 3,402                     | 3,460                     | 6,536                     |
| Peptide                                                 | 205                       | 142                       | 152                       |
| Other                                                   | 2                         | 32                        | 7                         |
| Water                                                   | 463                       | 14                        | 858                       |
| B-factor (Å <sup>2</sup> )                              |                           |                           |                           |
| Antibody                                                | 11.9                      | 45.3                      | 20.6                      |
| Peptide                                                 | 19.4                      | 64.0                      | 24.3                      |
| Other                                                   | 15.2                      | 55.4                      | 27.0                      |
| Water                                                   | 19.6                      | 21.9                      | 29.8                      |
| Ramachandran Plot                                       |                           |                           |                           |
| Preferred (%)                                           | 90.8                      | 86.3                      | 92.4                      |
| Allowed (%)                                             | 7.6                       | 13.2                      | 7.1                       |
| Outliers (%)                                            | 1.6                       | 0.5                       | 0.4                       |
| RMSD Bond (Å)                                           | 0.009                     | 0.005                     | 0.008                     |
| RMSD Angle (°)                                          | 1.61                      | 1.37                      | 1.53                      |
| PDB entry code                                          | 8JOW                      | 8ZPU                      | 8ZXW                      |

**Table S4. Frequency of bidentate interactions between an Arg residue (H-R95 and H-R53 for A4 and C7, respectively) and the phosphate group. Frequencies of the three independent simulations (800 ns each) were averaged.**

|            | $\text{PO}_3\text{H}^-$ (%) | $\text{PO}_3^{2-}$ (%) |
|------------|-----------------------------|------------------------|
| A4 (H-R95) | 8.5                         | 34.1                   |
| C7 (H-R53) | 97.4                        | 100                    |
